# Supplementary material for: Supramolecular Interactions of Terpyridine-Derived Cores of Metallomesogen Precursors
Source: Int J Mol Sci. 2013 Oct 15;14(10):20729–43. doi: 10.3390/ijms141020729 (PMC3821640; doi:10.3390/ijms141020729)

## Supplementary Information

Figure S1. Magnetic susceptibility measurements for  $[\text{Co}(\text{L2})_2](\text{BF}_4)_2 \cdot \text{H}_2\text{O}$ .

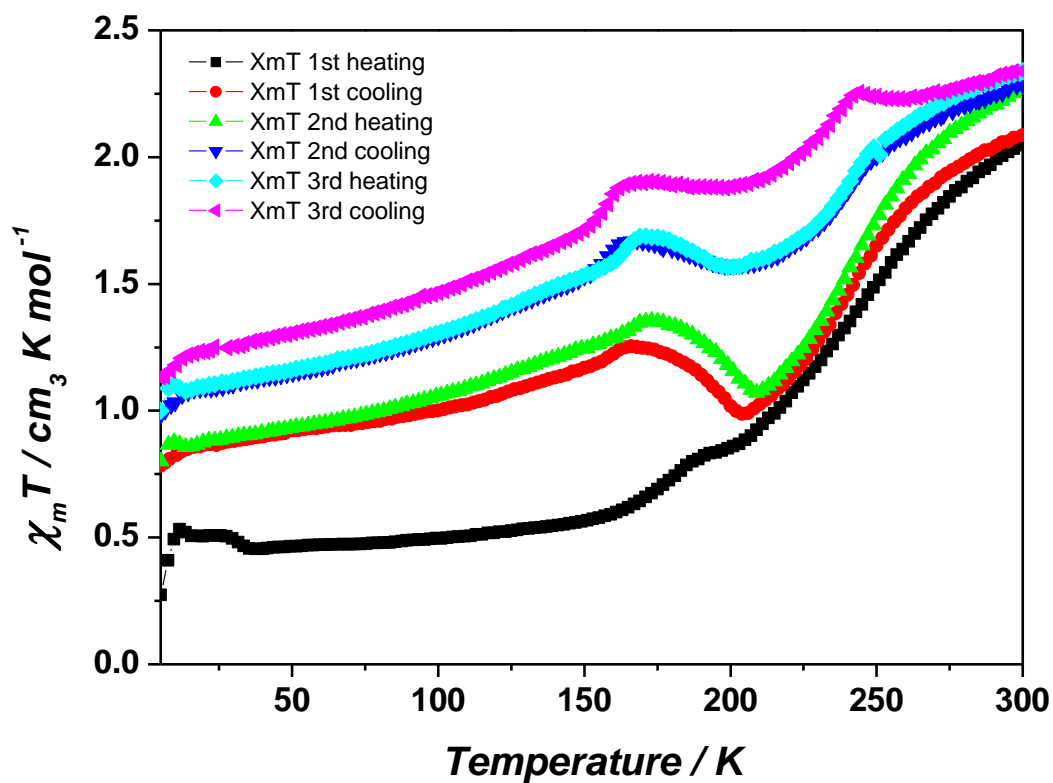

Figure S2. A partial view, down b, of the lattice of  $[\text{Cu}(\text{L3})_2](\text{ClO}_4)_2 \cdot \text{CH}_3\text{CN}$ .

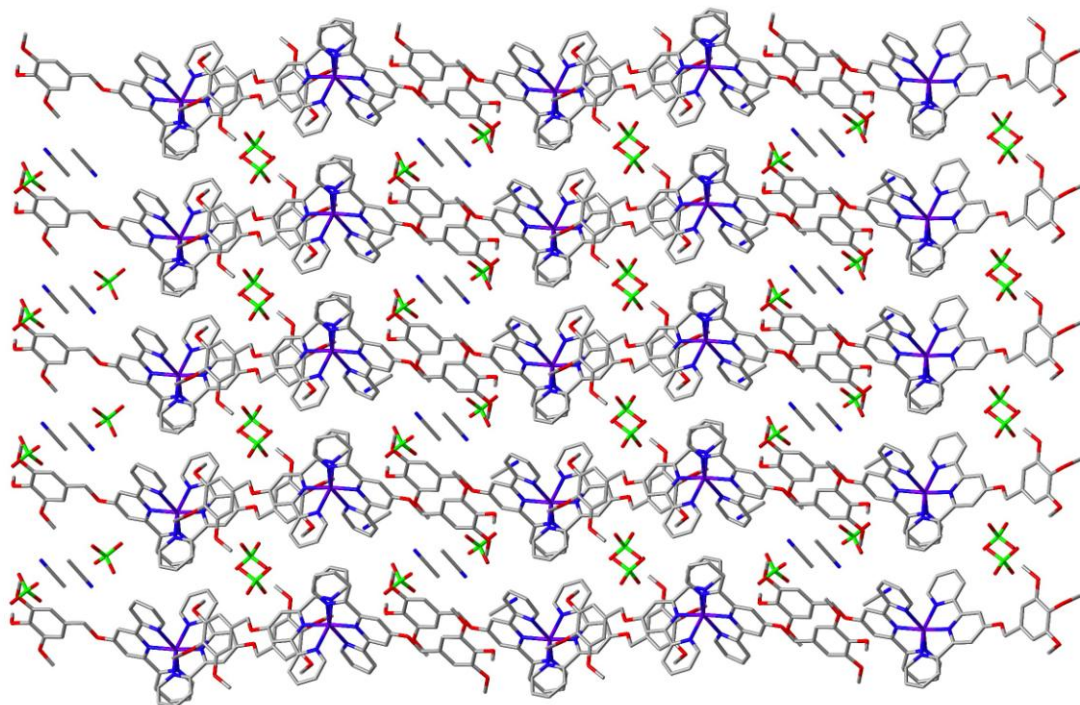

**Figure S3.** Views, perpendicular to the mean plane of the more nearly planar ligand, of the various cations studied in the present work.

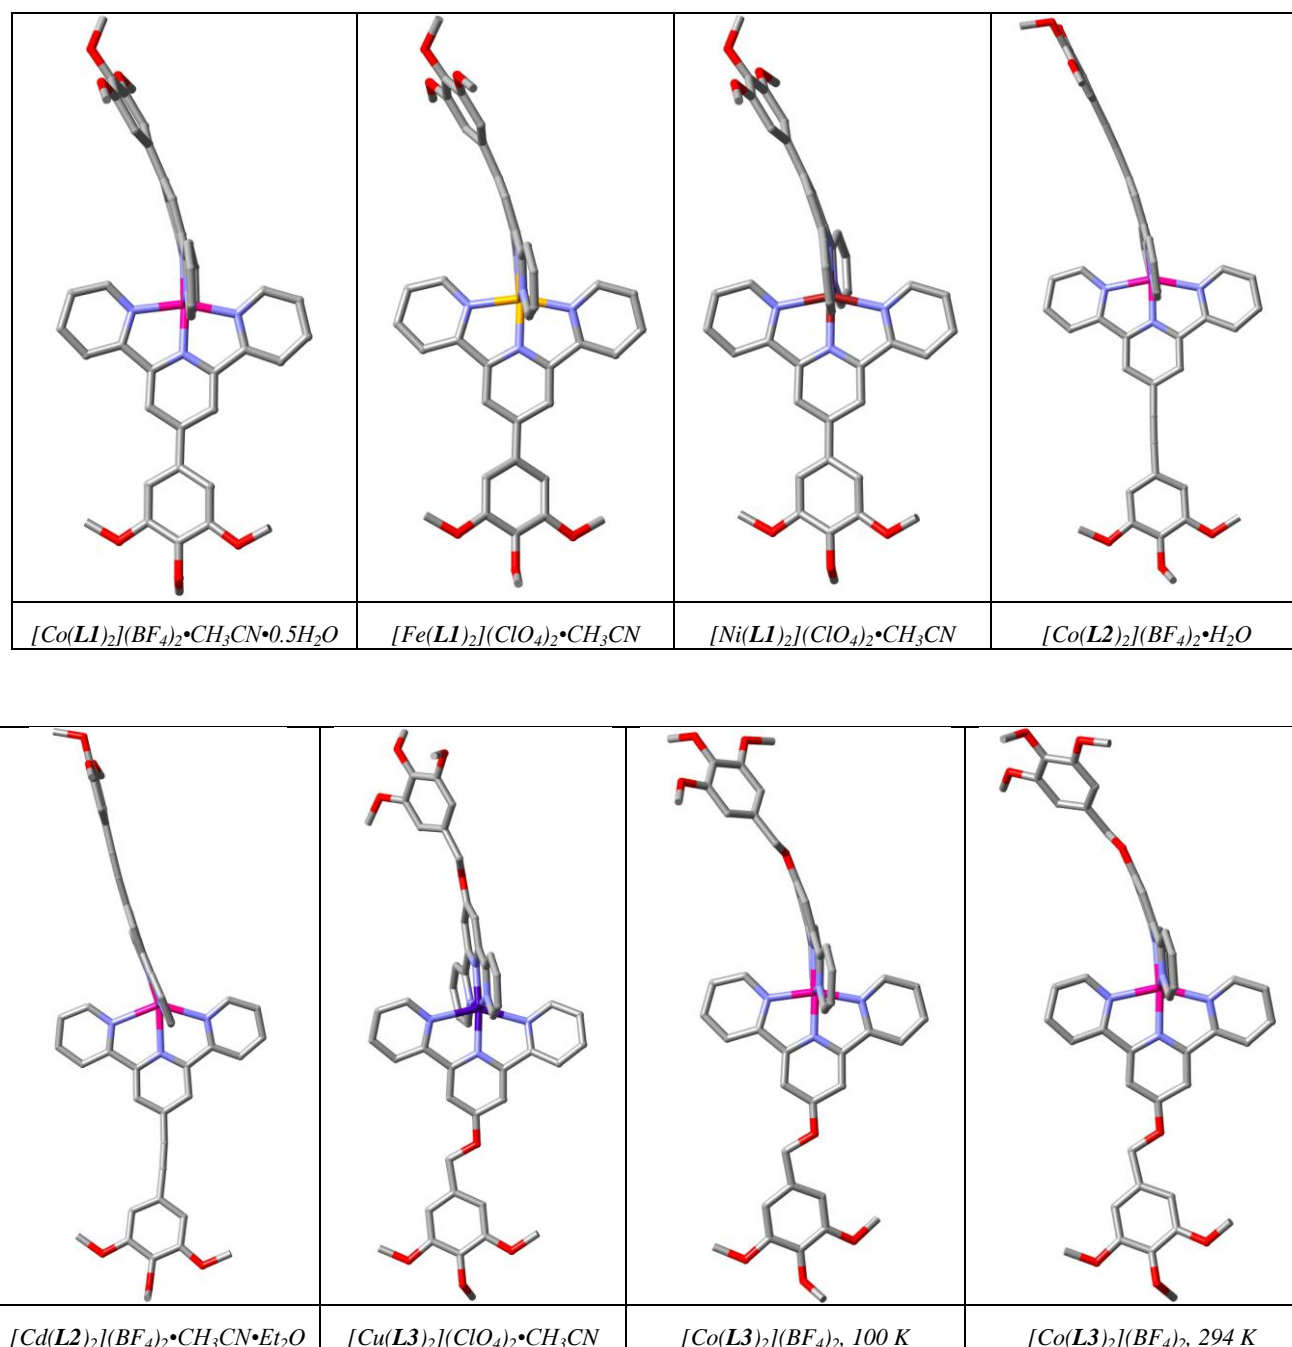

Supplement: Supplementary file 1 [file ijms-14-20729-s001.pdf]
